# Supplementary material
Source: publisher figshare collection journal article supplement (https://karger.figshare.com/ndownloader/files/31546931)
Supplement: Supplementary file 1 [file 31546931]

**Supplementary materials**


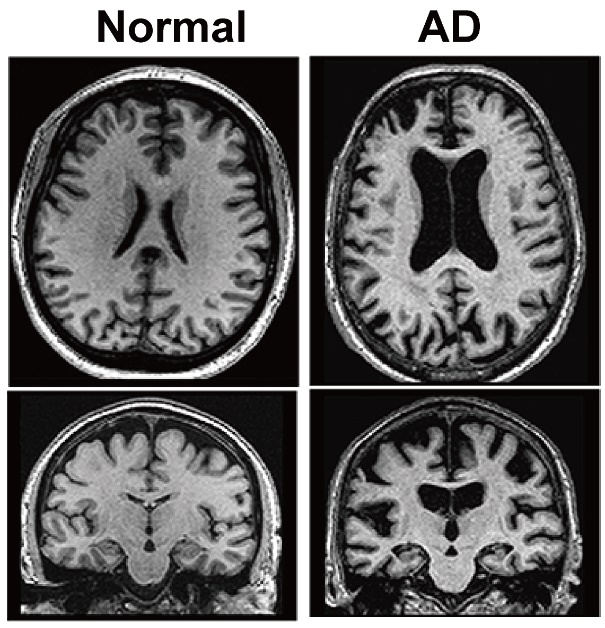


**Figure S1. Axial and coronal CT images of normal person and AD patient.**

Axial and coronal computed tomography (CT) images were acquired on a CT scanner (Philips) to evaluate hippocampus atrophy of a normal (female, 71 years old) and an AD patient (female, 76 years old) in Shandong Provincial Maternal and Child Health Care Hospital.
